# Supplementary material for: Cyclobutane dication, (CH2)42+: a model for a two-electron four-center (2e-4c) Woodward–Hoffmann frozen transition state
Source: publisher site journal article supplement (doi:10.3762/bjoc.15.148), 2019-07-03
Supplement: Additional file 1 [file 1860-5397-15-148-S1.pdf]

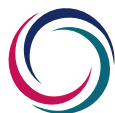

## Supporting Information

for

### **Cyclobutane dication, $(\text{CH}_2)_4^{2+}$ : a model for a two-electron four-center (2e-4c) Woodward–Hoffmann frozen transition state**

G. K. Surya Prakash and Golam Rasul

*Beilstein J. Org. Chem.* **2019**, *15*, 1475–1479. [doi:10.3762/bjoc.15.148](https://doi.org/10.3762/bjoc.15.148)

**MP2/cc-pVTZ and CCSD(T)/cc-pVTZ optimized Cartesian coordinates of 1–4, energies, ZPE and relative energies of 1–4 (Table S9) and calculated frequencies and IR intensities of 1 (Table S10)**

## Table of Contents

Table S1. MP2/cc-pVTZ optimized Cartesian coordinates of **1**

Table S2. MP2/cc-pVTZ optimized Cartesian coordinates of **2**

Table S3. MP2/cc-pVTZ optimized Cartesian coordinates of **3**

Table S4. MP2/cc-pVTZ optimized Cartesian coordinates of **4 TS**

Table S5. CCSD(T)/cc-pVTZ optimized Cartesian coordinates of **1**

Table S6. CCSD(T)/cc-pVTZ optimized Cartesian coordinates of **2**

Table S7. CCSD(T)/cc-pVTZ optimized Cartesian coordinates of **3**

Table S8. CCSD(T)/cc-pVTZ optimized Cartesian coordinates of **4 TS**

Table S9. Energies, ZPE and relative energies of **1 – 4**

Table S10. Calculated frequencies and IR intensities of **1**

**Table S1. MP2/cc-pVTZ optimized Cartesian coordinates of 1**

|   |         |         |         |
|---|---------|---------|---------|
| C | 0.5927  | 0.6283  | -0.2817 |
| C | -0.5927 | -0.6283 | -0.2817 |
| C | -0.5927 | 1.2138  | 0.2673  |
| C | 0.5927  | -1.2138 | 0.2673  |
| H | 0.8708  | 0.7741  | -1.3207 |
| H | -0.8708 | -0.7741 | -1.3207 |
| H | 1.4318  | 0.5075  | 0.4403  |
| H | -1.4318 | -0.5075 | 0.4403  |
| H | -1.2920 | 1.7460  | -0.3780 |
| H | 1.2920  | -1.7460 | -0.3780 |
| H | -0.7455 | 1.2479  | 1.3448  |
| H | 0.7455  | -1.2479 | 1.3448  |

**Table S2. MP2/cc-pVTZ optimized Cartesian coordinates of 2**

|   |         |         |         |
|---|---------|---------|---------|
| C | -1.0393 | 0.7122  | 0.0000  |
| C | -1.0393 | -0.7122 | 0.0000  |
| C | 1.0393  | 0.7122  | 0.0000  |
| C | 1.0393  | -0.7122 | 0.0000  |
| H | -1.1500 | 1.2527  | 0.9395  |
| H | -1.1500 | -1.2527 | 0.9395  |
| H | -1.1500 | 1.2527  | -0.9395 |
| H | -1.1500 | -1.2527 | -0.9395 |
| H | 1.1500  | 1.2527  | -0.9395 |
| H | 1.1500  | -1.2527 | -0.9395 |
| H | 1.1500  | 1.2527  | 0.9395  |
| H | 1.1500  | -1.2527 | 0.9395  |

**Table S3. MP2/cc-pVTZ optimized Cartesian coordinates of 3**

|   |         |         |         |
|---|---------|---------|---------|
| C | -0.2256 | 0.7154  | 0.4570  |
| C | 0.2256  | -0.7154 | 0.4570  |
| C | 0.2256  | 1.7456  | -0.3556 |
| C | -0.2256 | -1.7456 | -0.3556 |
| H | -0.8516 | 0.9691  | 1.3156  |
| H | 0.8516  | -0.9691 | 1.3156  |
| H | -0.1297 | 2.7574  | -0.1674 |
| H | 0.1297  | -2.7574 | -0.1674 |

|   |         |         |         |
|---|---------|---------|---------|
| H | 0.8803  | 1.5714  | -1.2060 |
| H | -0.8803 | -1.5714 | -1.2060 |
| H | -0.9393 | 1.0552  | -0.5511 |
| H | 0.9393  | -1.0552 | -0.5511 |

**Table S4. MP2/cc-pVTZ optimized Cartesian coordinates of 4 TS**

|   |         |         |         |
|---|---------|---------|---------|
| C | 0.6356  | 0.6444  | -0.0003 |
| C | -0.6356 | -0.6444 | -0.0003 |
| C | -0.6356 | 1.3160  | 0.0003  |
| C | 0.6356  | -1.3160 | 0.0003  |
| H | 1.1769  | 0.6676  | -0.9480 |
| H | -1.1769 | -0.6676 | -0.9480 |
| H | 1.1776  | 0.6673  | 0.9470  |
| H | -1.1776 | -0.6673 | 0.9470  |
| H | -1.0948 | 1.6304  | -0.9351 |
| H | 1.0948  | -1.6304 | -0.9351 |
| H | -1.0939 | 1.6304  | 0.9362  |
| H | 1.0939  | -1.6304 | 0.9362  |

**Table S5. CCSD(T)/cc-pVTZ optimized Cartesian coordinates of 1**

|   |         |         |         |
|---|---------|---------|---------|
| C | 0.5814  | 0.6366  | -0.2881 |
| C | -0.5814 | -0.6366 | -0.2881 |
| C | -0.5814 | 1.2486  | 0.2752  |
| C | 0.5814  | -1.2486 | 0.2752  |
| H | 0.8557  | 0.7932  | -1.3241 |
| H | -0.8557 | -0.7932 | -1.3241 |
| H | 1.4297  | 0.5091  | 0.4150  |
| H | -1.4297 | -0.5091 | 0.4150  |
| H | -1.2874 | 1.7740  | -0.3645 |
| H | 1.2874  | -1.7740 | -0.3645 |
| H | -0.7348 | 1.2685  | 1.3506  |
| H | 0.7348  | -1.2685 | 1.3506  |

**Table S6. CCSD(T)/cc-pVTZ optimized Cartesian coordinates of 2**

|   |         |         |        |
|---|---------|---------|--------|
| C | -1.0507 | 0.7111  | 0.0000 |
| C | -1.0507 | -0.7111 | 0.0000 |
| C | 1.0507  | 0.7111  | 0.0000 |
| C | 1.0507  | -0.7111 | 0.0000 |
| H | -1.1568 | 1.2514  | 0.9371 |

|   |         |         |         |
|---|---------|---------|---------|
| H | -1.1568 | -1.2514 | 0.9371  |
| H | -1.1568 | 1.2514  | -0.9371 |
| H | -1.1568 | -1.2514 | -0.9371 |
| H | 1.1568  | 1.2514  | -0.9371 |
| H | 1.1568  | -1.2514 | -0.9371 |
| H | 1.1568  | 1.2514  | 0.9371  |
| H | 1.1568  | -1.2514 | 0.9371  |

**Table S7. CCSD(T)/cc-pVTZ optimized Cartesian coordinates of **3****

|   |         |         |         |
|---|---------|---------|---------|
| C | -0.2397 | 0.7120  | 0.4350  |
| C | 0.2397  | -0.7120 | 0.4350  |
| C | 0.2397  | 1.7628  | -0.3348 |
| C | -0.2397 | -1.7628 | -0.3348 |
| H | -0.8837 | 0.9464  | 1.2818  |
| H | 0.8837  | -0.9464 | 1.2818  |
| H | -0.1329 | 2.7659  | -0.1442 |
| H | 0.1329  | -2.7659 | -0.1442 |
| H | 0.9225  | 1.6112  | -1.1653 |
| H | -0.9225 | -1.6112 | -1.1653 |
| H | -0.9275 | 1.0377  | -0.5732 |
| H | 0.9275  | -1.0377 | -0.5732 |

**Table S8. CCSD(T)/cc-pVTZ optimized Cartesian coordinates of **4 TS****

|   |         |         |         |
|---|---------|---------|---------|
| C | 0.6212  | 0.6506  | 0.0000  |
| C | -0.6212 | -0.6506 | 0.0000  |
| C | -0.6212 | 1.3682  | -0.0000 |
| C | 0.6212  | -1.3682 | -0.0000 |
| H | 1.1709  | 0.6631  | -0.9393 |
| H | -1.1709 | -0.6631 | -0.9393 |
| H | 1.1708  | 0.6632  | 0.9394  |
| H | -1.1708 | -0.6632 | 0.9394  |
| H | -1.0819 | 1.6748  | -0.9350 |
| H | 1.0819  | -1.6748 | -0.9350 |
| H | -1.0820 | 1.6749  | 0.9349  |
| H | 1.0820  | -1.6749 | 0.9349  |

**Table S9.** Energies (-au), ZPE and relative energies of **1 – 4**

| No.         | MP2/cc-pVTZ | ZPE        | CCSD(T)/cc-pVTZ | rel. energy <sup>a</sup> |
|-------------|-------------|------------|-----------------|--------------------------|
|             |             | (kcal/mol) |                 | (kcal/mol)               |
| <b>1</b>    | 155.96386   | 64.6       | 156.09920       | 0.0                      |
| <b>2</b>    | 155.93888   | 63.6       | 156.07487       | 14.3                     |
| <b>3</b>    | 155.97491   | 62.5       | 156.11407       | -11.4                    |
| <b>4 TS</b> | 155.95750   | 64.9       | 156.09311       | 4.1                      |

<sup>a</sup>at the CCSD(T)/cc-pVTZ//CCSD(T)/cc-pVTZ + ZPE level

**Table S10.** Calculated frequencies (cm<sup>-1</sup>) and IR intensities (km/mol) of **1**

| MP2/cc-pVTZ//MP2/cc-pVTZ |        | CCSD(T)/cc-pVTZ//CCSD(T)/cc-pVTZ |        |
|--------------------------|--------|----------------------------------|--------|
| freq.                    | inten. | freq.                            | inten. |
| 210                      | 165    | 191                              | 184    |
| 212                      | 37     | 204                              | 39     |
| 363                      | 6      | 333                              | 10     |
| 564                      | 8      | 552                              | 7      |
| 752                      | 192    | 740                              | 143    |
| 780                      | 7      | 751                              | 5      |
| 840                      | 67     | 846                              | 57     |
| 876                      | 14     | 865                              | 16     |
| 997                      | 98     | 974                              | 168    |
| 1000                     | 1      | 997                              | 3      |
| 1085                     | 28     | 1090                             | 33     |
| 1135                     | 6      | 1143                             | 3      |
| 1170                     | 0      | 1178                             | 0      |
| 1189                     | 107    | 1187                             | 104    |
| 1219                     | 8      | 1223                             | 6      |
| 1225                     | 30     | 1228                             | 32     |
| 1265                     | 105    | 1262                             | 91     |
| 1292                     | 11     | 1304                             | 12     |
| 1437                     | 13     | 1448                             | 15     |
| 1446                     | 144    | 1459                             | 134    |
| 1507                     | 10     | 1511                             | 15     |
| 1530                     | 0      | 1535                             | 0      |
| 2898                     | 328    | 2898                             | 266    |
| 2920                     | 17     | 2918                             | 14     |
| 3116                     | 111    | 3106                             | 105    |
| 3117                     | 8      | 3107                             | 8      |
| 3205                     | 15     | 3179                             | 18     |
| 3217                     | 173    | 3190                             | 121    |
| 3240                     | 28     | 3209                             | 26     |
| 3241                     | 204    | 3210                             | 208    |
